# Supplementary material
Source: MDPI journal article supplement (https://www.mdpi.com/2073-4344/8/5/215)
Supplement: s1 [file s1]

## Supporting information

# The Pros and Cons of Polydopamine-Sensitized Titanium Oxide for the Photoreduction of CO<sub>2</sub>

Tongyao Wang, Ming Xia and Xueqian Kong \*

Center for Chemistry of Novel & High-Performance Materials, and Department of Chemistry, Zhejiang University, Hangzhou, 310027, PR China

Corresponding author: [kxq@zju.edu.cn](mailto:kxq@zju.edu.cn)

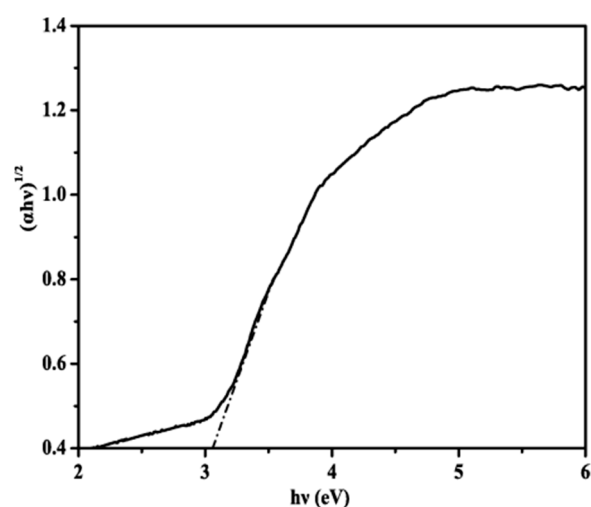

Figure S1. The plot of  $(\alpha h\nu)^{1/2}$  versus  $h\nu$  for the bandgap calculation of A-Ti.

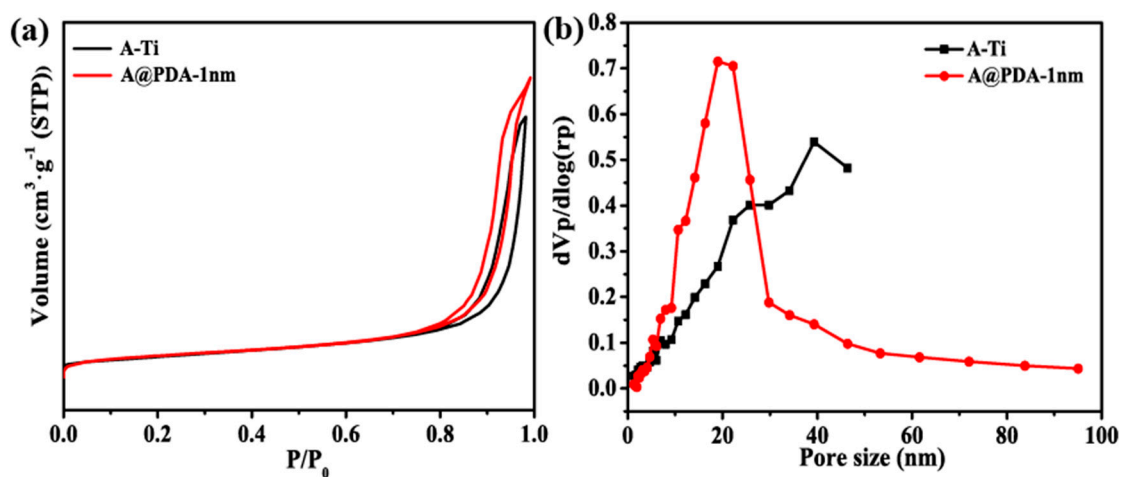

Figure S2. (a) Nitrogen adsorption and desorption isotherms and (b) pore size distribution curves of A-Ti and A@PDA-1nm.

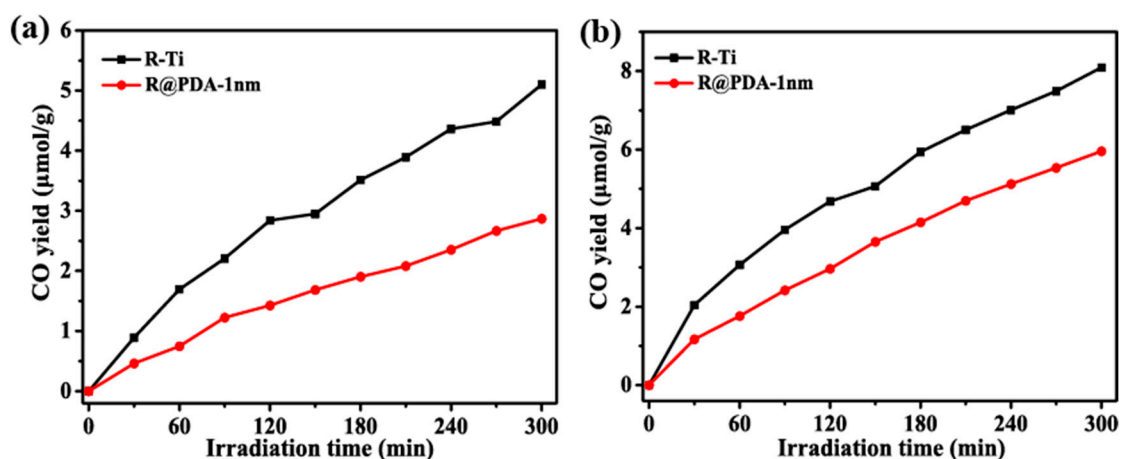

Figure S3. CO yield comparison of R-Ti and R@PDA-1nm under Visible light (a) and UV-vis light(b) for the photoreduction of CO<sub>2</sub>.

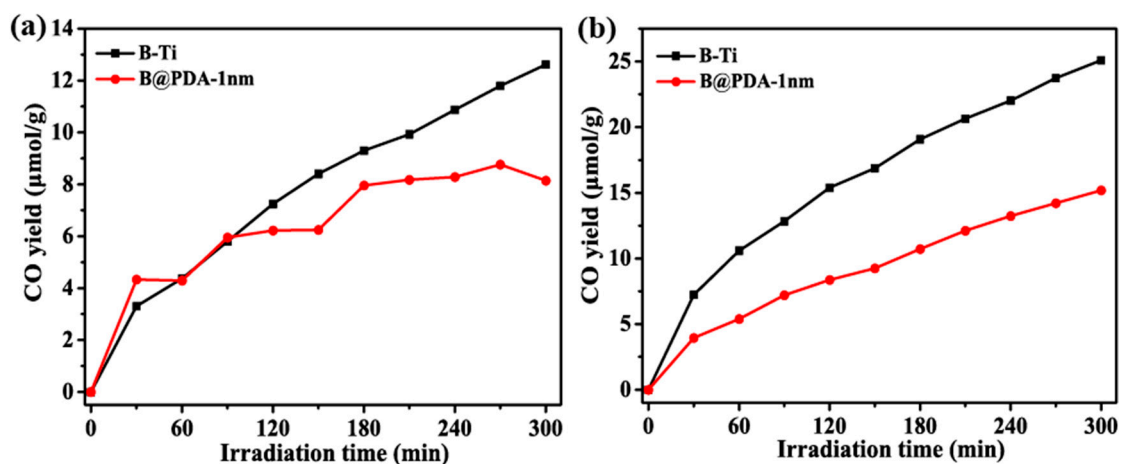

Figure S4. CO yield comparison of B-Ti and B@PDA-1nm under Visible light (a) and UV-vis light(b) for the photoreduction of CO<sub>2</sub>.

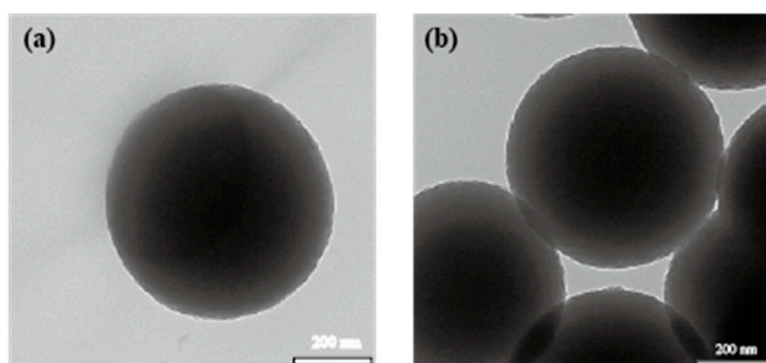

Figure S5. TEM images of (a) pristine PDA and (b) PDA after illuminating under UV-vis light in N<sub>2</sub> for 6h.

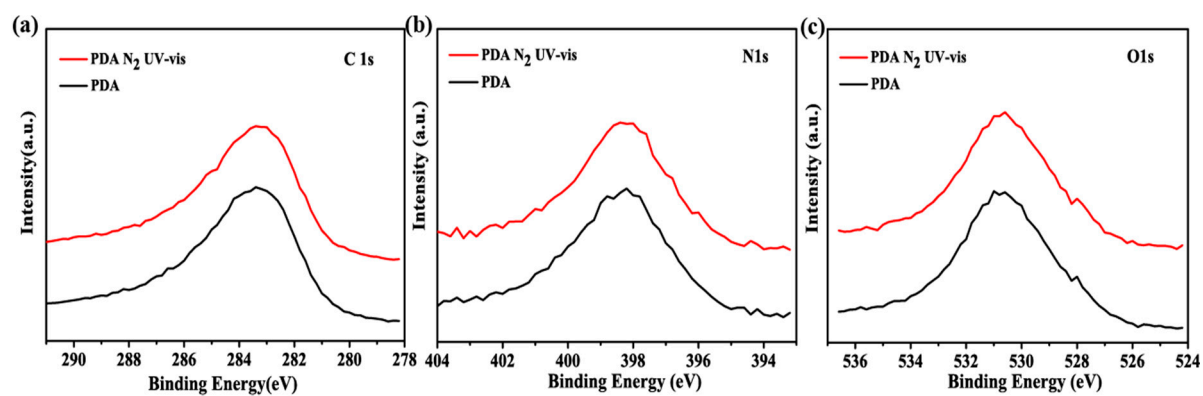

**Figure S6.** XPS spectra of PDA and PDA after illuminating under UV-vis light in N<sub>2</sub> for 6h: (a)C1s, (b)N1s, and (c)O1s.
